# Supplementary material for: Self-Management of Diabetes and Associated Factors among Patients Seeking Chronic Care in Tshwane, South Africa: A Facility-Based Study
Source: MDPI journal article supplement (doi:10.3390/ijerph20105887), 2023-05-19
Supplement: s1 [file s1]

## DIABETES SELF-MANAGEMENT QUESTIONNAIRE

### PROJECT TITLE

#### SELF-MANAGEMENT PRACTICES AND ASSOCIATED FACTORS IN DIABETIC PATIENTS IN TSHWANE, SOUTH AFRICA

#### **Greetings to participants and introduction of the study**

“Thank you for agreeing to participate in this study. This study is about self-management practices and associated factors in diabetic patients in Tshwane, South Africa. The questionnaire is divided into four sections, namely, general and Socioeconomic questions, diabetes knowledge, self-management practices and anthropometry. We are starting with measuring your weight, height, waist, and hip circumferences, as well as anthropometry. Thereafter, we would request that you fill the questionnaire to best of your ability. For some questions you are welcomed to refer to your medical records. If there is a question you do not understand, please feel free to ask. I am here as a main researcher, together with the research assistants. Kindly feel free to request a questionnaire written in a language you prefer: English, Afrikaans or isiZulu”.

**Instructions:**

- 1) You must be diagnosed with diabetes, above 18 years of age, and on treatment for more than 1 year.
- 2) Answer all questions. You are requested to be as honest as possible. There is no correct or incorrect answer.
- 3) Please fill in the answer or tick the appropriate box as requested.
- 4) Please do not hesitate to ask if you are uncertain of the meaning of a question.
- 5) Please do not write your name on the questionnaire.

Participant number: \_\_\_\_\_ (For office use only)

| <b><u>Section A: General and Socioeconomic Questions</u></b>                                                                                                              |                          |                              |                          |
|---------------------------------------------------------------------------------------------------------------------------------------------------------------------------|--------------------------|------------------------------|--------------------------|
| <b>1) What is your current age?</b>                                                                                                                                       |                          | _____ years                  |                          |
| <b>2) Please specify your race. Tick the appropriate box that applies to you.</b>                                                                                         |                          |                              |                          |
| Black Africans                                                                                                                                                            | <input type="checkbox"/> | Coloured                     | <input type="checkbox"/> |
| Indian/Asian                                                                                                                                                              | <input type="checkbox"/> | White                        | <input type="checkbox"/> |
| <b>3) Please specify your gender. Tick the appropriate box that applies to you.</b>                                                                                       |                          |                              |                          |
| Male                                                                                                                                                                      | <input type="checkbox"/> | Female                       | <input type="checkbox"/> |
| <b>4) What is your marital status? Please tick the box that applies to you</b>                                                                                            |                          |                              |                          |
| Single                                                                                                                                                                    | <input type="checkbox"/> | Widowed                      | <input type="checkbox"/> |
| Married                                                                                                                                                                   | <input type="checkbox"/> |                              |                          |
| Divorced                                                                                                                                                                  | <input type="checkbox"/> |                              |                          |
| <b>5) How would you describe your place of residence? Please tick the box most appropriate to you</b>                                                                     |                          |                              |                          |
| Urban                                                                                                                                                                     | <input type="checkbox"/> |                              |                          |
| Peri-urban (i.e., Township)                                                                                                                                               | <input type="checkbox"/> |                              |                          |
| <b>6) How long ago were you diagnosed with diabetes? Please tick the box that applies to you</b>                                                                          |                          |                              |                          |
| >1 year, but less than five (5) years ago                                                                                                                                 | <input type="checkbox"/> | More than five (5) years ago | <input type="checkbox"/> |
| <b>7) What level of social support do you receive from friends and family? Tick the appropriate box that applies to you.</b>                                              |                          |                              |                          |
| Good                                                                                                                                                                      | <input type="checkbox"/> | Average                      | <input type="checkbox"/> |
| Poor                                                                                                                                                                      | <input type="checkbox"/> |                              |                          |
| <b>8) What is your household's total monthly net income? (Income before taxes). This can be earned via formal employment, informal employment, or a government grant.</b> |                          |                              |                          |
| Less than R1500                                                                                                                                                           | <input type="checkbox"/> | R1501 – R3000                | <input type="checkbox"/> |
| R5001-R10 000                                                                                                                                                             | <input type="checkbox"/> | R10 001- R15 000             | <input type="checkbox"/> |
|                                                                                                                                                                           |                          | R3001-R5000                  | <input type="checkbox"/> |
|                                                                                                                                                                           |                          | More than R15 001            | <input type="checkbox"/> |
| <b>9) What is your highest level of education? Tick the appropriate box.</b>                                                                                              |                          |                              |                          |
| Did not attend school                                                                                                                                                     | <input type="checkbox"/> | Completed Grade 12           | <input type="checkbox"/> |
| Primary education                                                                                                                                                         | <input type="checkbox"/> | Tertiary education           | <input type="checkbox"/> |
| Secondary education                                                                                                                                                       | <input type="checkbox"/> |                              |                          |
| <b>10) Do you suffer from any of the following medical conditions? Please tick the appropriate box if the condition applies to you.</b>                                   |                          |                              |                          |
| High blood pressure                                                                                                                                                       | <input type="checkbox"/> | High cholesterol             | <input type="checkbox"/> |
| Heart disease                                                                                                                                                             | <input type="checkbox"/> | None                         | <input type="checkbox"/> |

|                                                                                                                                                |  |                                |  |
|------------------------------------------------------------------------------------------------------------------------------------------------|--|--------------------------------|--|
| <b>11) Do you have any other comorbidities/illnesses besides those stated above? If yes, please specify</b>                                    |  |                                |  |
| Yes                                                                                                                                            |  | No                             |  |
| Namely:                                                                                                                                        |  |                                |  |
| <b>12) Do you have any of the following complications related to diabetes? Please tick the appropriate box if the condition applies to you</b> |  |                                |  |
| Amputation of toes/foot/leg                                                                                                                    |  | Kidney failure/ kidney disease |  |
| Poor sensation in feet                                                                                                                         |  | Loss of eyesight               |  |
| None                                                                                                                                           |  |                                |  |
| <b>13) Have you been hospitalized due to any complications related to diabetes?</b>                                                            |  |                                |  |
| Yes                                                                                                                                            |  | No                             |  |
| <b>14) Do you have access to a blood glucose machine to self-monitor your blood glucose levels at home?</b>                                    |  |                                |  |
| Yes                                                                                                                                            |  | No                             |  |
| <b>15) Please tick what medication you are on to help manage your diabetes</b>                                                                 |  |                                |  |
| Oral hypoglycaemic medication (tablets)                                                                                                        |  | Insulin                        |  |
| Both above                                                                                                                                     |  | Neither                        |  |

### **Section B: Diabetes Knowledge**

***This section deals with your knowledge about diabetes. For each question, please circle the option (a, b, c, d) that you think is the most correct answer***

|                                                                                                                                                                                                                   |
|-------------------------------------------------------------------------------------------------------------------------------------------------------------------------------------------------------------------|
| <b>16) For a person in good control, what effect does exercise have on blood glucose?</b><br>a) Lowers it<br>b) Raises it<br>c) Has no effect                                                                     |
| <b>17) A low blood glucose reaction may be caused by:</b><br>a) Heavy exercise<br>b) Infection<br>c) Overeating<br>d) Not taking your insulin                                                                     |
| <b>18) Which of the following is highest in carbohydrates?</b><br>a) Baked chicken<br>b) Cheese<br>c) Baked potato<br>d) Peanut butter                                                                            |
| <b>19) Eating food lower in fat decreases your risk for:</b><br>a) Nerve disease<br>b) Kidney disease<br>c) Heart disease<br>d) Eye disease                                                                       |
| <b>20) The best way to take care of your feet is to:</b><br>a) Look at and wash them each day<br>b) Massage them with alcohol each day<br>c) Soak them for 1 hour each day<br>d) Buy shoes larger size than usual |
| <b>21) Numbness and tingling may be symptoms of:</b><br>a) Kidney disease<br>b) Nerve disease                                                                                                                     |

|                                                                                                                                                                                 |
|---------------------------------------------------------------------------------------------------------------------------------------------------------------------------------|
| c) Eye disease<br>d) Liver disease                                                                                                                                              |
| <b>22) Signs of ketoacidosis (DKA) include:</b><br>a) Shakiness<br>b) Sweating<br>c) Vomiting<br>d) Low blood glucose                                                           |
| <b>23) A low blood glucose reaction may be caused by:</b><br>a) Too much insulin<br>b) Too little insulin<br>c) Too much food<br>d) Too little exercise                         |
| <b>24) If you are beginning to have a low blood glucose reaction, you should:</b><br>a) Exercise<br>b) Lie down and rest<br>c) Drink some juice<br>d) Take rapid acting insulin |
| <b>25) Which is the best method for home glucose testing?</b><br>a) Urine testing<br>b) Blood testing<br>c) Both are equally good                                               |

**Section C: Self-management practices**

**26) On which of the following have you received self-management practice advice and education and have been instructed on to do, by your healthcare professional (for example, doctor or nurse). You may have multiple answers. Tick the appropriate box/boxes.**

|                         |  |                     |  |
|-------------------------|--|---------------------|--|
| Diabetic diet           |  | Foot care           |  |
| Exercise                |  | Smoking             |  |
| Blood sugar testing     |  | Alcohol consumption |  |
| Diabetes medication use |  | None of the above   |  |

***The following few questions relates to your diabetes self-management activities over the past seven (7) days. For each question, please circle the appropriate number of days that applies to you.***

**Diet**

**27) On how many of the past SEVEN (7) DAYS did you eat five or more servings of fruit and/or vegetables?**

0    1    2    3    4    5    6    7

**28) On how many of the past SEVEN (7) DAYS did you eat high fat foods such as red meat or full-fat dairy products?**

0    1    2    3    4    5    6    7

**Exercise**

29) On how many of the past SEVEN (7) DAYS did you participate in at least 30 minutes of continuous exercise? (Total minutes of continuous activity, including walking)

0 1 2 3 4 5 6 7

**Blood sugar testing**

30) On how many of the past SEVEN (7) DAYS did you test your blood sugar?

0 1 2 3 4 5 6 7

**Foot care**

31) On how many of the past SEVEN (7) DAYS did you check your feet for any wounds, skin changes or ingrown toenails?

0 1 2 3 4 5 6 7

32) On how many of the past SEVEN (7) DAYS did you inspect the inside of your shoes for any holes, thorns, small stones, or other abnormalities that may cause injury?

0 1 2 3 4 5 6 7

**Medication**

33) On how many of the last SEVEN (7) DAYS did you take your diabetes medication as recommended?

0 1 2 3 4 5 6 7

**Smoking**

34) If you are a smoker, on how many of the past SEVEN (7) DAYS did you smoke?

0 1 2 3 4 5 6 7

How many cigarettes did you smoke on average every day? \_\_\_\_\_cigarettes

I DO NOT SMOKE

**Alcohol consumption**

35) If you drink alcohol, on how many of the past SEVEN (7) DAYS did you drink alcohol?

0 1 2 3 4 5 6 7

How many alcoholic beverages did you drink on average per day? \_\_\_\_\_drinks

I DO NOT DRINK ALCOHOL

*The following few questions contain statements that describe self-management activities related to diabetes. Thinking about your self-management over the last eight (8) weeks, please rate the extent to which each statement applies to you.*

| <b>Please tick to what extent the following self-management activities apply to you</b>       | <b>Applies to me very much</b> | <b>Applies to me considerably</b> | <b>Cannot say specifically</b> | <b>Applies to me somewhat</b> | <b>Does not apply to me</b> |
|-----------------------------------------------------------------------------------------------|--------------------------------|-----------------------------------|--------------------------------|-------------------------------|-----------------------------|
| 36) Occasionally I eat lots of sweets and other foods rich in carbohydrates                   |                                |                                   |                                |                               |                             |
| 36) I strictly follow dietary recommendations made by my doctor or relevant healthcare worker |                                |                                   |                                |                               |                             |
| 38) I check my blood sugars daily with care and attention                                     |                                |                                   |                                |                               |                             |
| 39) I tend to forget to take my diabetes medication as recommended                            |                                |                                   |                                |                               |                             |
| 40) I avoid physical exercise, even though I know it would improve my diabetes                |                                |                                   |                                |                               |                             |
| 41) I do regular exercise to achieve optimal blood sugar levels                               |                                |                                   |                                |                               |                             |
| 42) I <u>keep</u> my regular doctors' appointments recommended for my diabetes treatment      |                                |                                   |                                |                               |                             |
| 43) My diabetes self-management is poor                                                       |                                |                                   |                                |                               |                             |

#### **Section D: Anthropometric Measurements**

*The following measurements need to be taken by the researcher.*

|             |    |                     |    |
|-------------|----|---------------------|----|
| Body weight | kg | Waist circumference | cm |
| Body height | m  | Hip circumference   | cm |

|                                                                |        |                                       |  |
|----------------------------------------------------------------|--------|---------------------------------------|--|
| Blood glucose<br>(Last 3 measurements in<br>file if available) |        | Blood pressure<br>(To be taken twice) |  |
| 1                                                              | mmol/L | 1SBP                                  |  |
| 2                                                              | mmol/L | 2SBP                                  |  |
| 3                                                              | mmol/L | 1DBP                                  |  |
|                                                                |        | 2DBP                                  |  |

-----END-----

***Thank you for your participation in the study***

***Researcher's name .....***

***Contact details.....***
